# Supplementary material for: The Cell Wall Polymer Lipoteichoic Acid Becomes Nonessential in Staphylococcus aureus Cells Lacking the ClpX Chaperone
Source: PubMed Central journal article supplement (PMC4981727; doi:10.1128/mbio.01228-16), 2016-08-09
Supplement: mbo004162933st1.pdf [file mbo004162933st1.pdf]

**Table S1: Bacterial strains, plasmids and primers used in this study**

| Strain                          | Description                                                                          | Source     |
|---------------------------------|--------------------------------------------------------------------------------------|------------|
| <b><i>E. coli</i> strains</b>   |                                                                                      |            |
| XL1 Blue                        | Cloning strain                                                                       | Stratagene |
| <b><i>S. aureus</i> strains</b> |                                                                                      |            |
| RN4220                          | Restriction deficient derivative of 8325-4                                           | (1)        |
| KB1475                          | RN4220 pKB1469                                                                       | This study |
| KB1478                          | RN4220 pRAB12-lacZ                                                                   | This study |
| SA564                           | Low-passage clinical isolate                                                         | (2)        |
| HI2781                          | SA564 $\Delta$ <i>clpX</i>                                                           | (3)        |
| HI2726                          | SA564 $\Delta$ <i>clpP</i>                                                           | (4)        |
| KB1090                          | 564-25-2: SA564 $\Delta$ <i>clpX</i> <i>ItaS</i> <sub>H476Q</sub> suppressor mutant  | This study |
| KB1501                          | SA564 $\Delta$ <i>clpX</i> <i>ItaS</i> :: <i>erm</i>                                 | This study |
| KB1492                          | SA564 pRAB11                                                                         | This study |
| KB1486                          | SA564 pKB1469                                                                        | This study |
| KB1496                          | SA564 $\Delta$ <i>clpX</i> pRAB11                                                    | This study |
| KB1490                          | SA564 $\Delta$ <i>clpX</i> pKB1469                                                   | This study |
| Newman                          | Clinial isolate (ATCC 25904)                                                         | (5)        |
| HI3461                          | Newman $\Delta$ <i>clpX</i>                                                          | This study |
| HI2564                          | Newman $\Delta$ <i>clpP</i>                                                          | (4)        |
| 8325-4                          | MSSA strain cured of prophages                                                       | (6)        |
| HI2209                          | 8325-4 $\Delta$ <i>clpX</i>                                                          | (7)        |
| HI2300                          | 8325-4 $\Delta$ <i>clpP</i>                                                          | (7)        |
| KB1133                          | 83-25C: 8325-4 $\Delta$ <i>clpX</i> <i>ItaS</i> <sub>382STOP</sub> suppressor mutant | This study |
| KB1262                          | 8325-4 $\Delta$ <i>clpX</i> <i>ItaS</i> <sub>122STOP</sub> suppressor mutant         | This study |
| KB1241                          | 8325-4 $\Delta$ <i>clpX</i> <i>ermB</i>                                              | This study |
| KB1506                          | 8325-4 $\Delta$ <i>clpX</i> <i>clpP</i> :: $\Phi$ N $\Sigma$                         | This study |
| KB1510                          | 8325-4 <i>ItaS</i> <sub>382STOP</sub> $\Delta$ <i>clpX</i> pRAB12-lacZ               | This study |

|                 |                                                                                                |                                                                                                |
|-----------------|------------------------------------------------------------------------------------------------|------------------------------------------------------------------------------------------------|
| KB1509          | 8325-4 <i>ItaS</i> <sub>382STOP</sub> $\Delta$ <i>clpX</i> pKB1469                             | This study                                                                                     |
| ANG4052         | 8325-4 <i>iltaS</i>                                                                            | This study                                                                                     |
| ANG4053         | 8325-4 $\Delta$ <i>clpX-iltaS</i>                                                              | This study                                                                                     |
| JE2             | CA-MRSA strain USA300 LAC cured of plasmids                                                    | (8)                                                                                            |
| HI3393          | JE2 $\Delta$ <i>clpX</i>                                                                       | (9)                                                                                            |
| NE912           | JE2 <i>clpP</i> :: $\Phi$ N $\Sigma$                                                           | Nebraska Transposon Mutant Library ( <a href="http://www.narsa.net">http://www.narsa.net</a> ) |
| KB1399          | JE2 <i>clpP</i> :: $\Phi$ N $\Sigma$ , transduced from NE912                                   | (9)                                                                                            |
| LAC*            | Erm sensitive CA-MRSA LAC strain (AH1263)                                                      | (10)                                                                                           |
| ANG1961         | LAC* $\Delta$ <i>gdpP</i> :: <i>kan</i>                                                        | (11)                                                                                           |
| ANG2142         | US3: LAC* <i>ItaS</i> :: <i>erm</i> suppressor                                                 | (11)                                                                                           |
| <b>Plasmids</b> |                                                                                                |                                                                                                |
| pRAB11          | Expression vector with anhydrotetracycline inducible <i>xyl/tet</i> promoter. Cam <sup>R</sup> | (12)                                                                                           |
| pRAB12-lacZ     | Expression vector with anhydrotetracycline inducible <i>xyl/tet</i> promoter. Cam <sup>R</sup> | (12)                                                                                           |
| pKB1469         | pRAB12-lacZ containing <i>clpX</i> under control of the <i>xyl/tet</i> promoter                | This study                                                                                     |
| <b>Primers</b>  |                                                                                                |                                                                                                |
| Name            | Sequence (5' - 3')                                                                             |                                                                                                |
| KB71F           | TATCTAATTTATTCAAGTACTTTTCGC                                                                    |                                                                                                |
| KB71R           | AACTTGTTAAGGCTTTGATGAC                                                                         |                                                                                                |
| KB73F           | CAGAATTATTAACACGTACATTTGAC                                                                     |                                                                                                |
| KB76F           | GTTTCATTTCCATTTGCTATACCTCC                                                                     |                                                                                                |
| KB76R           | TATTCATCGCACGTATTACTTCCA                                                                       |                                                                                                |
| KB110F          | GGACTGGCCGCCTAATAATAAAA                                                                        |                                                                                                |
| KB110R          | TTTGCGGGAGTAGTTCAACTTTT                                                                        |                                                                                                |
| KB111F          | CCGAATTCTTATAACACATCAATGATTAAGCTG                                                              |                                                                                                |
| KB111R          | CCAGATCTAACGAATAGGGGTGTAAAAAGAATG                                                              |                                                                                                |

|             |                      |
|-------------|----------------------|
| KB121F      | GACGATGCAGAACAACGTG  |
| KB121R      | CCATACCCTGGAACATCCAC |
| KB122F      | CTTCTGGGCGAATTTGTGCT |
| KB122R      | ACAAGGTGGACGCAAACATC |
| saclpX385f  | GACGATGCAGAACAACGTG  |
| saclpX2447r | CCATACCCTGGAACATCCAC |
| saclpP413f  | AGAATTATAAGTAAGAAG   |
| saclpP1644r | ATTGACACCTTGTTTACTC  |

1. **Kreiswirth BN, Löfdahl S, Betley MJ, O'Reilly M, Schlievert PM, Bergdoll MS, Novick RP.** 1983. The toxic shock syndrome exotoxin structural gene is not detectably transmitted by a prophage. *Nature* **305**:709–712.

2. **Somerville GA, Beres SB, Fitzgerald JR, DeLeo FR, Cole RL, Hoff JS, Musser JM.** 2002. In vitro serial passage of *Staphylococcus aureus*: changes in physiology, virulence factor production, and agr nucleotide sequence. *J Bacteriol* **184**:1430–1437.

3. **Jelsbak L, Ingmer H, Valihrach L, Cohn MT, Christiansen MHG, Kallipolitis BH, Frees D.** 2010. The chaperone ClpX stimulates expression of *Staphylococcus aureus* protein A by Rot dependent and independent pathways. *PLoS ONE* **5**:e12752.

4. **Frees D, Andersen JH, Hemmingsen L, Koskenniemi K, Bæk KT, Muhammed MK, Gudeta DD, Nyman TA, Sukura A, Varmanen P, Savijoki K.** 2012. New insights into *Staphylococcus aureus* stress tolerance and virulence regulation from an analysis of the role of the ClpP protease in the strains Newman, COL, and SA564. *J Proteome Res* **11**:95–108.

5. **Duthie ES, Lorenz LL.** 1952. Staphylococcal coagulase; mode of action and antigenicity. *J Gen Microbiol* **6**:95–107.
6. **Bæk KT, Frees D, Renzoni A, Barras C, Rodriguez N, Manzano C, Kelley WL.** 2013. Genetic variation in the *Staphylococcus aureus* 8325 strain lineage revealed by whole-genome sequencing. *PLoS ONE* **8**:e77122.
7. **Frees D, Qazi S, Hill PJ, Ingmer H.** 2003. Alternative roles of ClpX and ClpP in *Staphylococcus aureus* stress tolerance and virulence. *Mol Microbiol* **48**:1565–1578.
8. **Fey PD, Endres JL, Yajjala VK, Widhelm TJ, Boissy RJ, Bose JL, Bayles KW.** 2013. A genetic resource for rapid and comprehensive phenotype screening of nonessential *Staphylococcus aureus* genes. *MBio* **4**:e00537–12.
9. **Bæk KT, Gründling A, Mogensen RG, Thøgersen L, Petersen A, Paulander W, Frees D.** 2014.  $\beta$ -Lactam resistance in methicillin-resistant *Staphylococcus aureus* USA300 is increased by inactivation of the ClpXP protease. *Antimicrob Agents Chemother* **58**:4593–4603.
10. **Boles BR, Thoendel M, Roth AJ, Horswill AR.** 2010. Identification of genes involved in polysaccharide-independent *Staphylococcus aureus* biofilm formation. *PLoS ONE* **5**:e10146.
11. **Corrigan RM, Abbott JC, Burhenne H, Kaeffer V, Gründling A.** 2011. c-di-AMP is a new second messenger in *Staphylococcus aureus* with a role in controlling cell size and envelope stress. *PLoS Pathog* **7**:e1002217.

12. **Helle L, Kull M, Mayer S, Marincola G, Zelder M-E, Goerke C, Wolz C, Bertram R.** 2011. Vectors for improved Tet repressor-dependent gradual gene induction or silencing in *Staphylococcus aureus*. *Microbiology (Reading, Engl)* **157**:3314–3323.
